# Supplementary material for: Uniform Pd–Pt alloy nanoparticles supported on graphite nanoplatelets with high electrocatalytic activity towards methanol oxidation
Source: Royal Society of Chemistry journal article supplement (doi:10.1039/c4ta06076h), 2015-01-01
Supplement: c4ta06076h1.pdf [file c4ta06076h1.pdf]

**Uniform Pd-Pt alloy nanoparticules supported on graphite  
nanoplatelets with high electrocatalytic activity toward  
methanol oxidation**

Genlei Zhang<sup>a</sup>, Chengde Huang<sup>b</sup>, Ruijie Qin<sup>a</sup>, Zechao Shao<sup>a</sup>, De An<sup>a</sup>, Wen Zhang<sup>a</sup>,  
Yuxin Wang<sup>a</sup>, \*

<sup>a</sup> School of Chemical Engineering and Technology, State Key Laboratory of Chemical Engineering, Co-Innovation Center of Chemical Science & Engineering, Tianjin Key Laboratory of Membrane Science and Desalination Technology, Tianjin University, Weijin Road, Tianjin 300072, PR China

<sup>b</sup> School of Chemical Engineering and Technology, Department of Applied Chemistry, Tianjin University, Weijin Road, Tianjin 300072, PR China

\* Corresponding author. Tel./fax: +86 22 27890515.

E-mail address: yxwang@tju.edu.cn (Y. Wang)

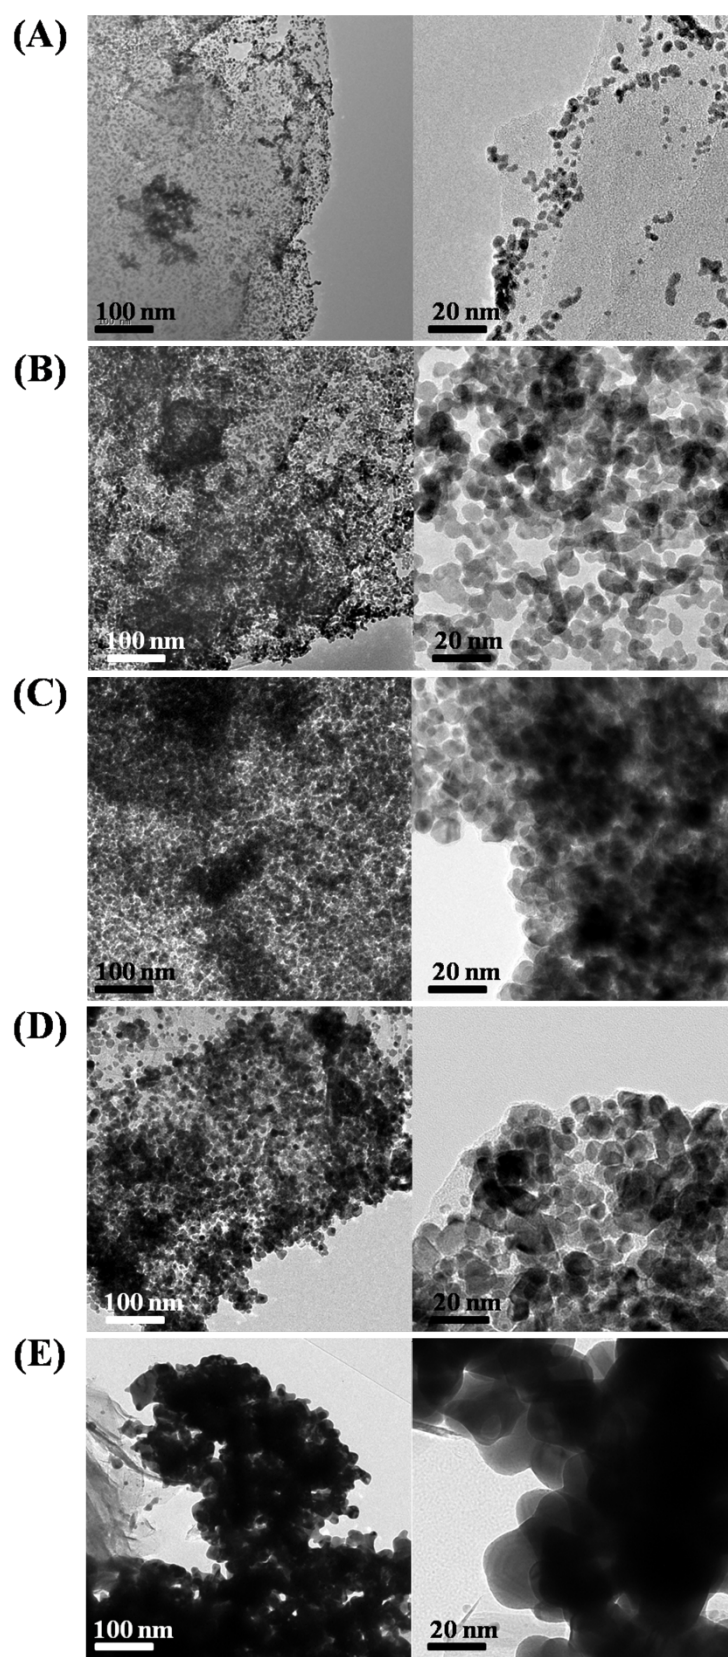

**Figure S1** TEM images of Pt (A), Pd<sub>1</sub>Pt<sub>3</sub> (B), Pd<sub>1</sub>Pt<sub>1</sub> (C), Pd<sub>3</sub>Pt<sub>1</sub> (D) and Pd (E) on bare GNPs, respectively.

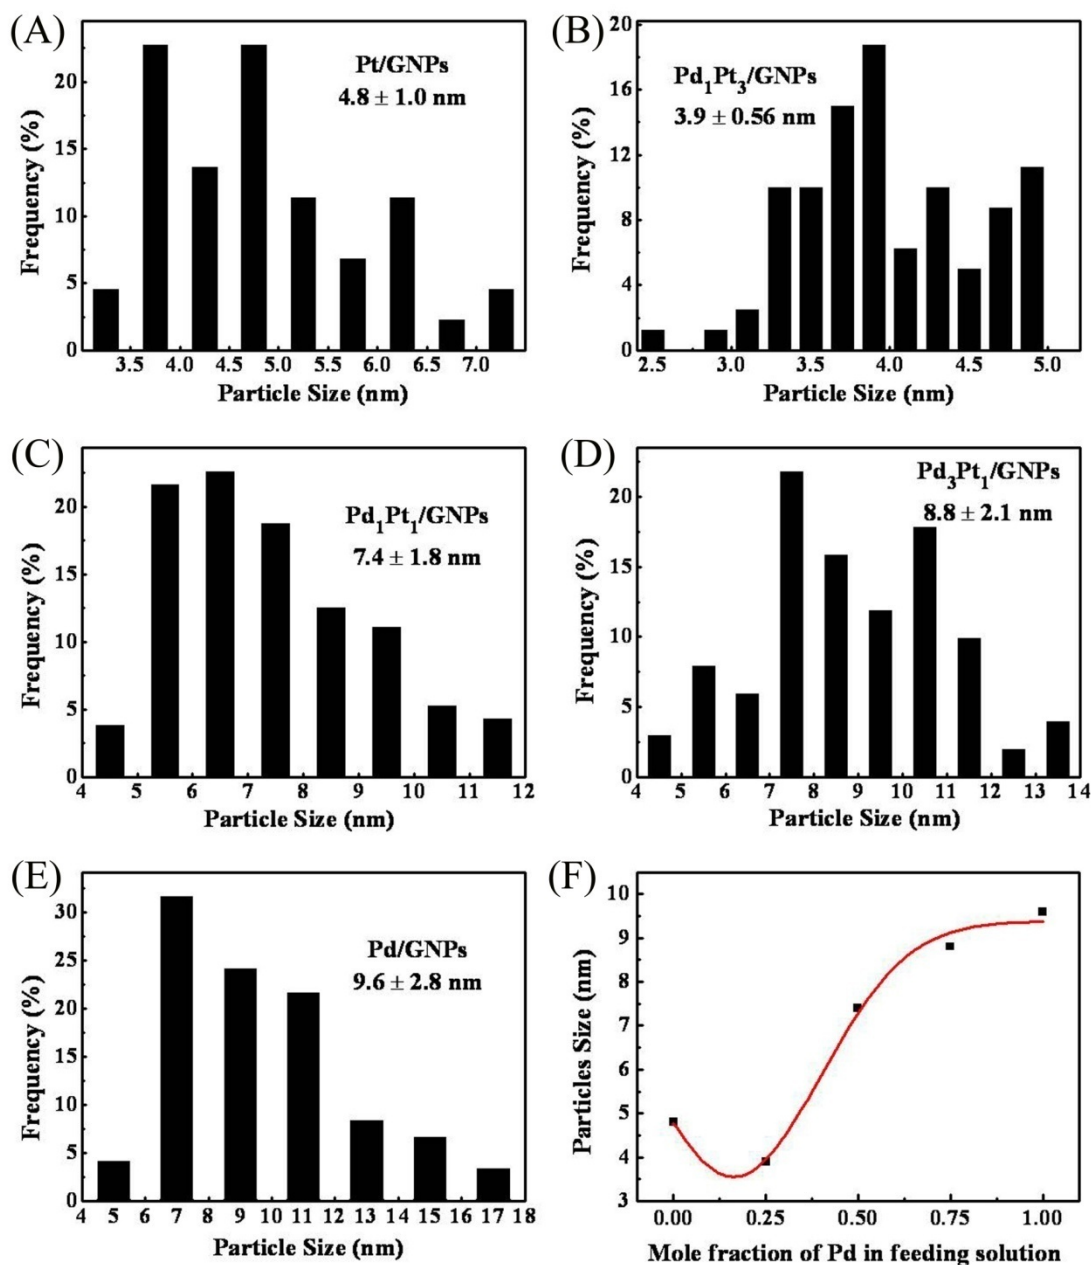

**Figure S2** Sizes distributions of the nanoparticles in (A) Pt/GNPs, (B) Pd<sub>1</sub>Pt<sub>3</sub>/GNPs, (C) Pd<sub>1</sub>Pt<sub>1</sub>/GNPs, (D) Pd<sub>3</sub>Pt<sub>1</sub>/GNPs, (E) Pd/GNPs and (F) particle sizes of the Pd, Pt, and Pd-Pt bimetallic NPs with different mole fraction of Pd in feeding solution.

From Figure S2, it can be seen that the average size of the metal nanoparticles in Pt/GNPs, Pd<sub>1</sub>Pt<sub>3</sub>/GNPs, Pd<sub>1</sub>Pt<sub>1</sub>/GNPs, Pd<sub>3</sub>Pt<sub>1</sub>/GNPs and Pd/GNPs catalysts as estimated from the histograms is  $4.8 \pm 1.0$  nm,  $3.9 \pm 0.56$  nm,  $7.4 \pm 1.8$  nm,  $8.8 \pm 2.1$  nm and  $9.6 \pm 2.8$  nm, respectively. More than 150 nanoparticles were counted in obtaining the results, as commonly practiced by others [1].

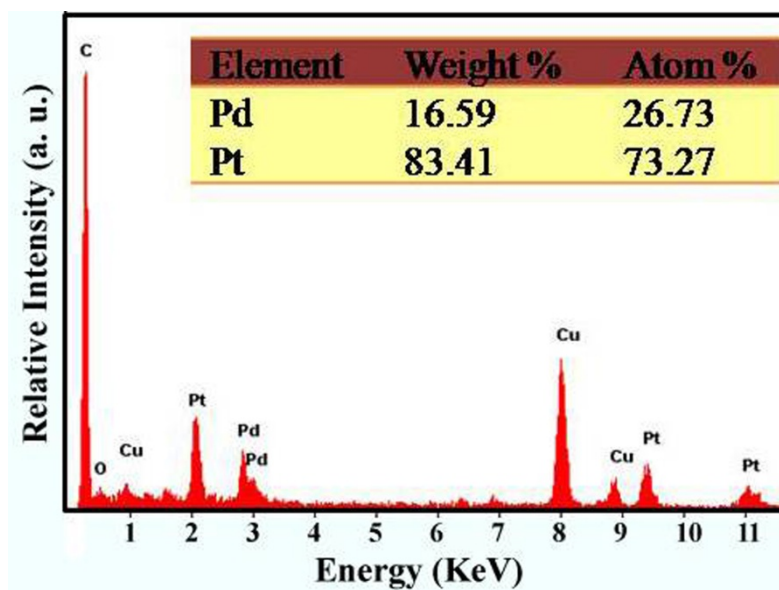

**Figure S3** EDX spectrum of Pd<sub>1</sub>Pt<sub>3</sub>/GNPs and the inset table shows element contents based on EDX measurement.

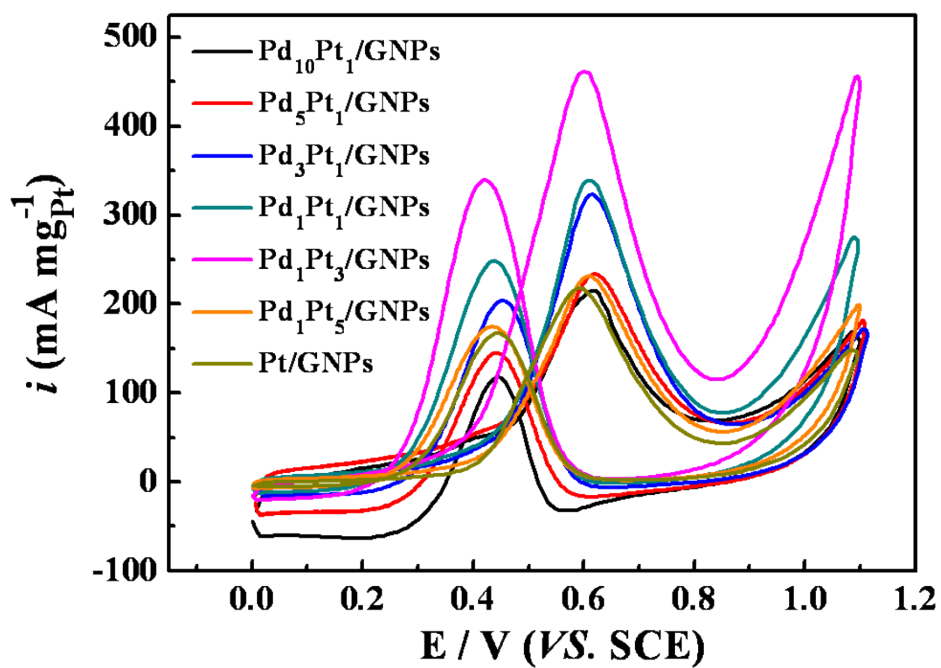

**Figure S4 (A)** Cyclic voltammograms (CVs) of Pt/GNPs, Pd<sub>1</sub>Pt<sub>5</sub>/GNPs, Pd<sub>1</sub>Pt<sub>3</sub>/GNPs, Pd<sub>1</sub>Pt<sub>1</sub>/GNPs, Pd<sub>3</sub>Pt<sub>1</sub>/GNPs, Pd<sub>5</sub>Pt<sub>1</sub>/GNPs, and Pd<sub>10</sub>Pt<sub>1</sub>/GNPs catalysts in 0.5 M H<sub>2</sub>SO<sub>4</sub> + 1.0 M methanol at a scan rate of 20 mV s<sup>-1</sup>.

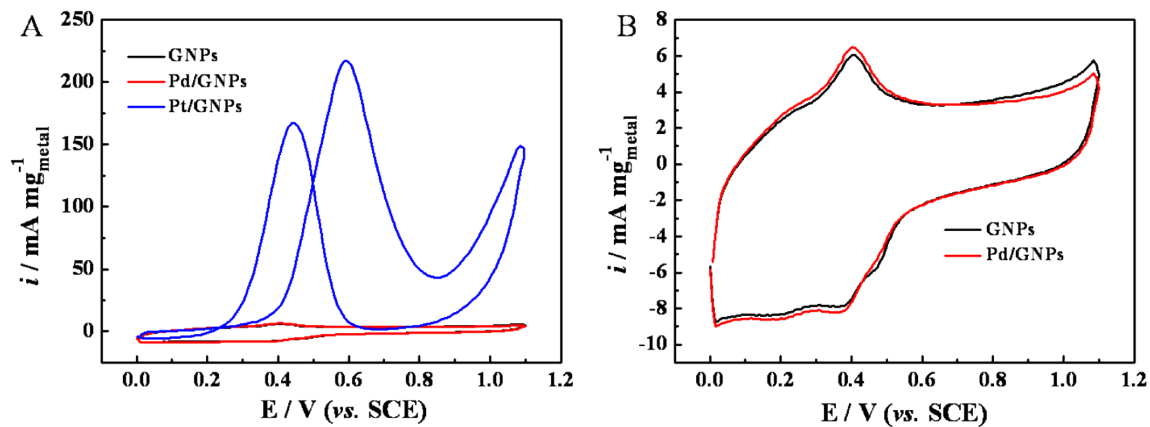

**Figure S5** (A) CVs of GNPs, Pt/GNPs and Pd/GNPs catalysts in 0.5 M H<sub>2</sub>SO<sub>4</sub> + 1.0 M methanol at a scan rate of 20 mV s<sup>-1</sup>; (B) The same CVs of GNPs and Pd/GNPs as in (A), but shown with enlarged vertical axis.

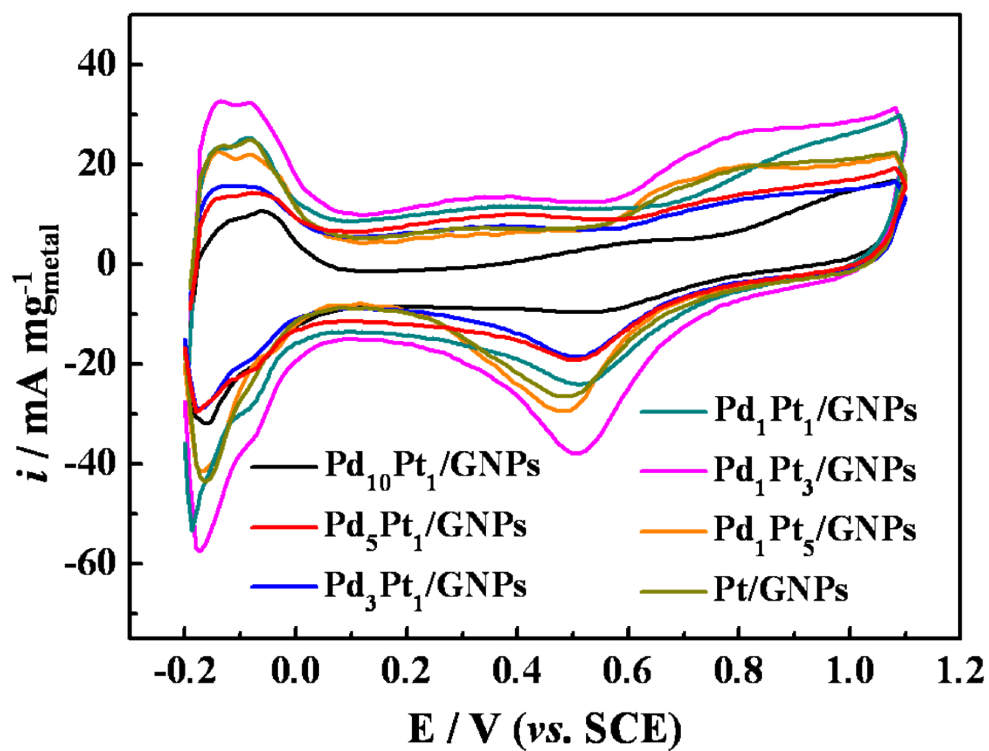

**Figure S6** Cyclic voltammograms (CVs) curves of catalysts of different Pd to Pt ratios in 0.5 M H<sub>2</sub>SO<sub>4</sub> solution at a scan rate of 50 mV s<sup>-1</sup>.

**Table S1** Summary of the composition and loading date for the catalysts on the basis of ICP-OES analysis.

| Catalysts                              | Metal Ratio<br>(Pd/Pt) | Metal Loading (%) |       |             |
|----------------------------------------|------------------------|-------------------|-------|-------------|
|                                        |                        | Pd                | Pt    | Total Metal |
| Pd/GNPs                                | 1 : 0                  | 17.81             |       | 17.81       |
| Pd <sub>10</sub> Pt <sub>1</sub> /GNPs | 10 : 1.31              | 14.22             | 3.43  | 17.65       |
| Pd <sub>5</sub> Pt <sub>1</sub> /GNPs  | 5 : 1.22               | 12.64             | 5.68  | 18.32       |
| Pd <sub>3</sub> Pt <sub>1</sub> /GNPs  | 3 : 1.13               | 11.12             | 7.7   | 18.82       |
| Pd <sub>1</sub> Pt <sub>1</sub> /GNPs  | 1 : 0.95               | 6.80              | 11.89 | 18.69       |
| Pd <sub>1</sub> Pt <sub>3</sub> /GNPs  | 1 : 2.92               | 3.04              | 16.32 | 19.36       |
| Pd <sub>1</sub> Pt <sub>5</sub> /GNPs  | 1 : 4.89               | 1.91              | 17.2  | 19.11       |
| Pt/GNPs                                | 0 : 1                  |                   | 19.02 | 19.02       |



**Table S2** Electrochemical parameters obtained from Figure 6.

| PdCl <sub>4</sub> <sup>2-</sup> /PtCl <sub>6</sub> <sup>2-</sup><br>(mol/mol) | Peak (f)                                |                                      | Peak (b)                                |
|-------------------------------------------------------------------------------|-----------------------------------------|--------------------------------------|-----------------------------------------|
|                                                                               | <i>i<sub>f, peak</sub></i>              |                                      | <i>i<sub>b, peak</sub></i>              |
|                                                                               | (mA mg <sup>-1</sup> <sub>metal</sub> ) | (mA mg <sup>-1</sup> <sub>Pt</sub> ) | (mA mg <sup>-1</sup> <sub>metal</sub> ) |
| 0:1                                                                           | 216.99                                  | 216.99                               | 167.39                                  |
| 1:5                                                                           | 206.63                                  | 231.07                               | 155.91                                  |
| 1:3                                                                           | 385.22                                  | 460.24                               | 283.83                                  |
| 1:1                                                                           | 218.19                                  | 339.75                               | 159.41                                  |
| 3:1                                                                           | 122.81                                  | 323.09                               | 77.45                                   |
| 5:1                                                                           | 62.84                                   | 233.64                               | 39.05                                   |
| 10:1                                                                          | 34.64                                   | 215.63                               | 18.92                                   |

## References

- [1] L. Zhao, X. Ji, X. Sun, J. Li, W. Yang, X. Peng, *J. Phy. Chem. C*, 113 (2009) 16645-16651.
